# Supplementary material for: Antineoplastic Activity of 9″-Lithospermic Acid Methyl Ester in Glioblastoma Cells
Source: MDPI journal article supplement (doi:10.3390/ijms25042094), 2024-02-08
Supplement: s1 [file s1]

# SUPPLEMENTARY MATERIAL

## Antineoplastic Activity of 9''-Lithospermic Acid Methyl Ester in Glioblastoma Cells

Panagiota Tzitziridou<sup>1</sup>, Vasiliki Zoi<sup>1</sup>, Theodora Papagrigoriou<sup>2</sup>, Diamanto Lazari<sup>2</sup>,  
Chrisa Sioka<sup>1</sup>, Georgios A. Alexiou<sup>1,3</sup>, Athanassios P. Kyritsis<sup>1</sup>

<sup>1</sup>Neurosurgical Institute, University of Ioannina, 45500 Ioannina, Greece

<sup>2</sup>Laboratory of Pharmacognosy, Division of Pharmacognosy-Pharmacology, School of Pharmacy, Faculty of Health Sciences, Aristotle University of Thessaloniki, 54124 Thessaloniki, Greece

<sup>3</sup>Department of Neurosurgery, University of Ioannina, 45500 Ioannina, Greece

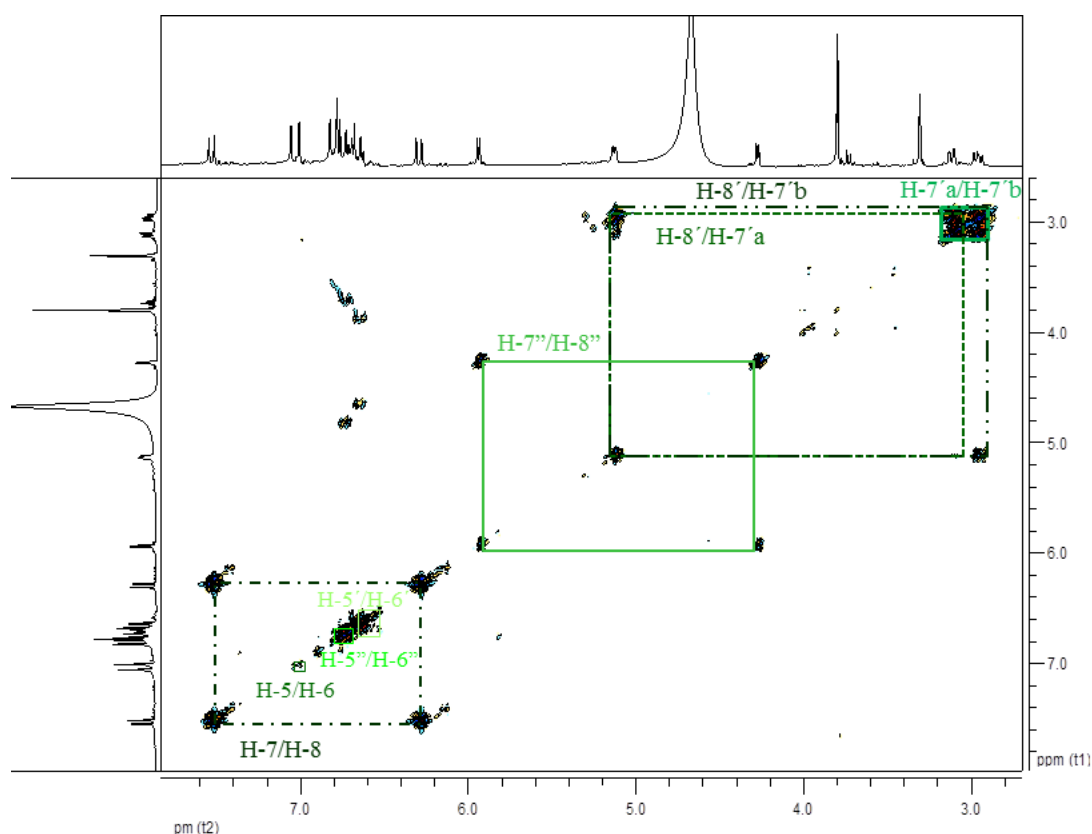

Figure S1. COSY Spectrum of 9''-methyl lithospermate (CD<sub>3</sub>OD, 500MHz).

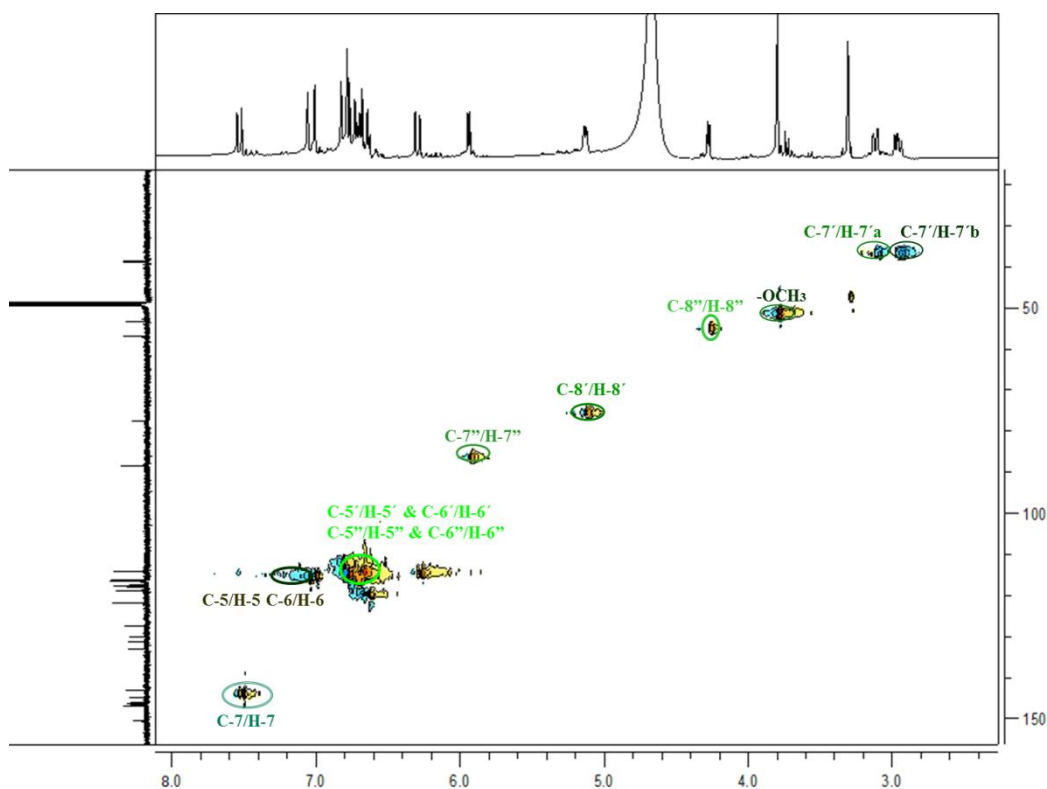

Figure S2. HSQC spectrum of 9''-methyl lithospermate (CD<sub>3</sub>OD, 500MHz).

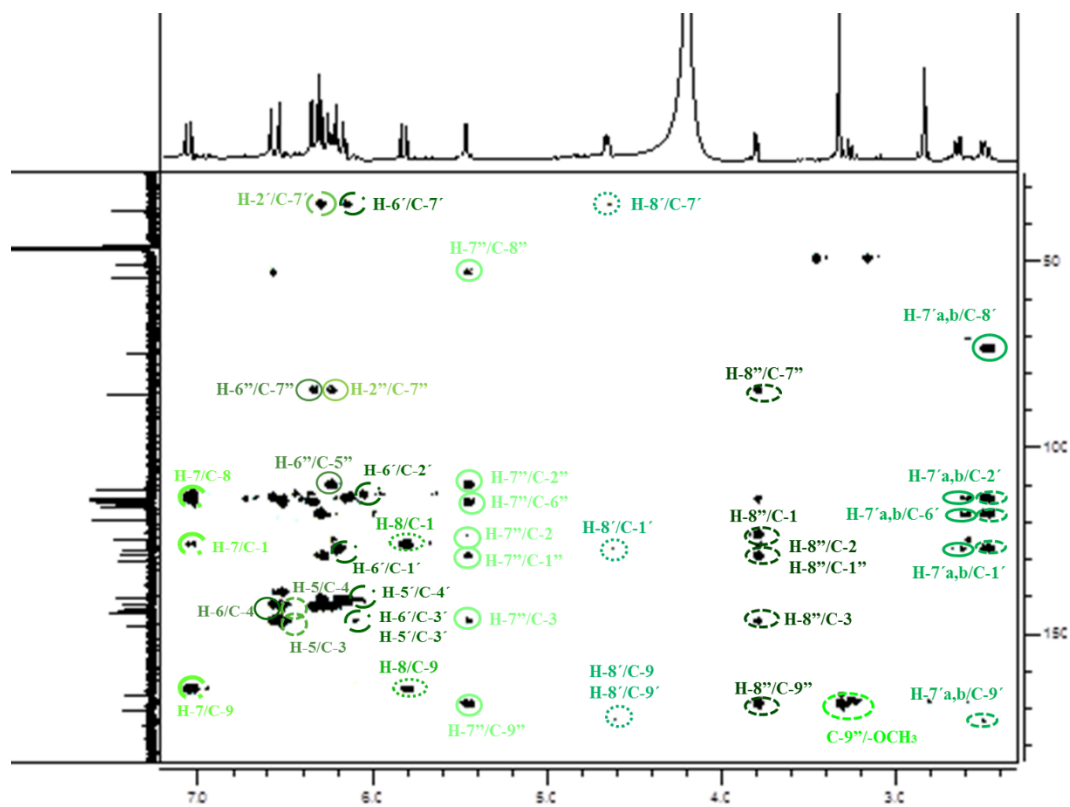

Figure S3. HMBC spectrum of 9''-methyl lithospermate (CD<sub>3</sub>OD, 500MHz).
